# Supplementary material for: Clinical Efficacy of Therapy with Recombinant Human Interferon α1b in Hand, Foot, and Mouth Disease with Enterovirus 71 Infection
Source: PubMed Central journal article supplement (PMC4755579; doi:10.1371/journal.pone.0148907), 2016-02-16
Supplement: pone.0148907.s004.pdf [file pone.0148907.s004.pdf]

S1 Table 1. The respiratory rates and heart rates of the HFMD patients every day during clinical trials

| Groups                                      | first day    | second day    | third day     | fourth day    | fifth day    |
|---------------------------------------------|--------------|---------------|---------------|---------------|--------------|
| <b>Respiratory rates (times/min)</b>        |              |               |               |               |              |
| Control group (n=97)                        | 32.93±3.17   | 31.83±6.88    | 30.09±6.08    | 27.25±4.35    | 26.43±4.59   |
| Ultrasonic aerosol inhalation group (n=102) | 32.10±6.62   | 30.35±6.24    | 28.84±6.54    | 26.53±4.70    | 25.40±4.28   |
| Intramuscular injection group (n=75)        | 32.38±6.67   | 35.25±7.56    | 31.29±6.27    | 28.77±6.15    | 27.68±4.79   |
| F value ( <i>P</i> value)                   | 0.258(0.772) | 10.052(0.000) | 2.867(0.59)   | 3.757(0.25)   | 4.601(0.11)  |
| <b>Heart rates (times/min)</b>              |              |               |               |               |              |
| Control group (n=97)                        | 130.40±11.47 | 152.82±23.19  | 126.53±11.73  | 121.01±8.42   | 118.18±8.04  |
| Ultrasonic aerosol inhalation group (n=102) | 131.55±12.43 | 128.64±12.24  | 123.66±9.88   | 118.97±8.29   | 130.77±15.38 |
| Intramuscular injection group (n=75)        | 128.87±6.97  | 139.61±11.75  | 131.36±10.31  | 141.23±31.04  | 123.07±8.29  |
| F value ( <i>P</i> value)                   | 1.392(0.250) | 0.836(0.435)  | 10.206(0.001) | 1.9972(0.142) | 0.638(0.529) |
